# Supplementary figures and images for: Effectiveness of Mental Health Courts in Reducing Recidivism: A Meta-Analysis
Source: Atypon-hosted journal article supplement (doi:10.1176/appi.ps.201700107), 2017-08-15

### Results of Systematic Literature Search

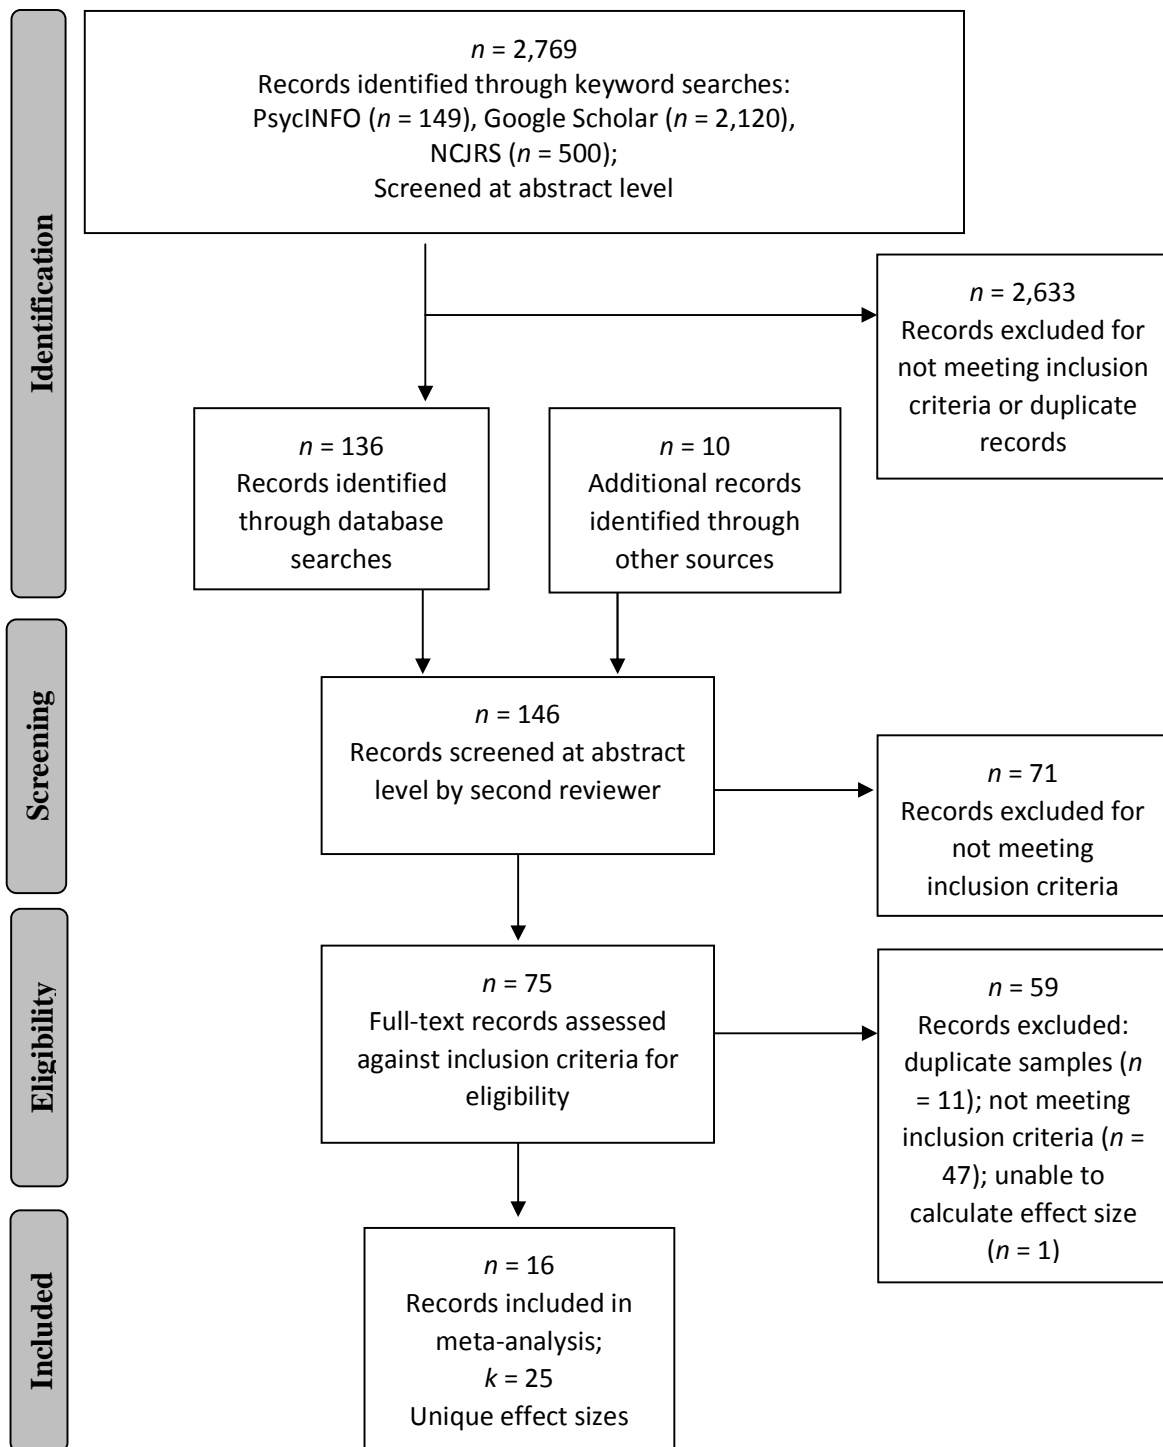

Supplement: appi.ps.201700107.ds001.pdf [file appi.ps.201700107.ds001.pdf]
